# Supplementary material
Source: PubMed Central journal article supplement (PMC7325726)
Supplement: NIHMS1565137-supplement-Supplement1.pdf [file NIHMS1565137-supplement-Supplement1.pdf]

## Supplementary Appendix

This appendix has been provided by the authors to give readers additional information about their work.

Supplement to: Walsh M, Merkel PA, Peh C-A, et al. Plasma exchange and glucocorticoids in severe ANCA-associated vasculitis. *N Engl J Med* 2020;382:622-31. DOI: 10.1056/NEJMoa1803537

## Supplementary Appendix

### Contents

|                                                                                                                                                                                                          |    |
|----------------------------------------------------------------------------------------------------------------------------------------------------------------------------------------------------------|----|
| Section S1. PEXIVAS Collaborators by Country .....                                                                                                                                                       | 2  |
| Section S2. Eligibility Criteria .....                                                                                                                                                                   | 8  |
| Section S3. Cyclophosphamide Induction Regimen .....                                                                                                                                                     | 10 |
| Section S4. Rituximab Induction Regimen .....                                                                                                                                                            | 12 |
| Section S5. Glucocorticoid Dosing Regimen .....                                                                                                                                                          | 13 |
| Section S6. Plasma Exchange Regimen .....                                                                                                                                                                | 14 |
| Section S7. Outcome Definitions .....                                                                                                                                                                    | 15 |
| Figure S1. Plasma exchange participants .....                                                                                                                                                            | 16 |
| Figure S2. Glucocorticoid dosing participants .....                                                                                                                                                      | 17 |
| Figure S3. Results of subgroup analyses of the effect of plasma exchange on the primary outcome of death from any cause or end-stage kidney disease. ....                                                | 18 |
| Figure S4. Results of subgroup analyses of the effect of a reduced-dose regimen of oral glucocorticoids on the primary outcome of death from any cause or end-stage kidney disease. .                    | 19 |
| Table S1. Pulse intravenous cyclophosphamide schedule. Doses may be modified for age and renal function. After week 13, patients in remission may be transitioned to remission-maintenance therapy. .... | 20 |
| Table S2. Oral and intravenous cyclophosphamide dose adjustments (mg/kg) for age and renal impairment. ....                                                                                              | 21 |
| Table S3. Dosing for oral Glucocorticoids in the standard and reduced-dose limbs from trial start .....                                                                                                  | 22 |
| Table S4. Health related quality of life 12 months after randomization .....                                                                                                                             | 23 |
| Table S5. Number of patients experiencing serious adverse events. ....                                                                                                                                   | 24 |

## **Section S1. PEXIVAS Collaborators by Country**

### **Australia:** *alphabetical list by centre*

Austin Hospital: Kathy Paizis  
Canberra Hospital: Giles Walters  
Concord Repatriation General Hospital: Meg Jardine  
Flinders Medical Centre: Caroline Milton  
Fremantle/Fiona Stanley Hospitals: Abu Ibrahim, Brian Siva  
Geelong Hospital: Michael Desmond  
George Institute for Global Health: Vlado Perkovic  
Gold Coast University Hospital: Jadadeesh Kurtkoti  
John Hunter Hospital: Eswari Vilayur  
Menzies School of Health Research: Alan Cass  
Monash Medical Centre: Shaun Summers, Fiona Brown, Jessica Ryan, Peter Kerr  
Nambour General Hospital: Euan Noble  
Prince of Wales Hospital: Grant Luxton  
Princess Alexandra Hospital: David W Mudge, Carmel Hawley, David W Johnson  
Royal Adelaide Hospital: Chen Au Peh, Randall J Faull  
Royal Brisbane & Women's Hospital: Dwarakanathan Ranganathan  
Royal Hobart Hospital: Lisa Jeffs  
Royal Melbourne Hospital: Kathy Nicholls, Peter Hughes  
Royal North Shore Hospital: Bruce Cooper  
Sir Charles Gairdner Hospital: Neil Boudville  
St. Vincent's Hospital: Sharon Ford, Robyn Langham  
Australasian Kidney Trials Network, University of Queensland: Donna Reidlinger, Alicia Morrish, Sunil V Badve, Elaine Pascoe, Peta-Anne Paul-Brent, Laura Robison, Andrea Valks

### **Belgium:** *alphabetical list by centre*

University Hospitals Leuven: Daniel Blockmans, Liesbet Henckaerts, Ben Sprangers

### **Canada:** *alphabetical list by centre*

Hôpital Saint-Luc: Rita Suri, Soumeya Brachemi

London Health Sciences Centre: William Clark, Amit Garg

Mount Sinai Hospital / Toronto General Hospital: Simon Carette, Christian Pagnoux, Heather Reich, David Barth

St. Joseph's Healthcare Hamilton: Michael Walsh, Nader Khalidi, Gerry Cox, Andrea Mazzetti, Diane Robins

St. Michael's Hospital: Ron Wald, Jeffrey Perl, Katerina Pavenski, Niki Dacouris

St. Paul's Hospital: Adeera Levin, Michael Copland

The Ottawa Hospital: Todd Fairhead

University of Alberta: Neesh Pannu, Muhammad Uwais Qarni, Syed Habib

University of Calgary: Louis Girard, Braden Manns

**Czech Republic:** *alphabetical list by centre*

General Faculty Hospital: Vladimir Tesar, Zdenka Hruskova, Zdenka Chocova

**Denmark:** *alphabetical list by centre*

Aarhus University Hospital: Johan Povlsen, Jon Gregersen, Per Ivarsen, Henrik Birn

Herlev Hospital: Elizabeth Krarup

Holstebro Hospital, Aarhus University: Erling B Pedersen, Ingrid Thomsen, Jesper Nørgaard Bech

Rigshospitalet Nephrology, Copenhagen University Hospital: Wladimir Szpirt, Martin Egfjord

**France:** *alphabetical list by centre*

Centre Hospitalier de Boulogne: Rafik Mesbah, Pierre Bataille

Centre Hospitalier de la Région d'Annecy: Isabelle Rey

Centre Hospitalier de Mulhouse: François Chantrel

Centre Hospitalier de Valenciennes: Philippe Vanhille, Thomas Quémeneur

Centre Hospitalier Universitaire de Grenoble: Pierre-Louis Carron, Philippe Zaoui

CHRU Brest-Hôpital La Cavale Blanche: Claire de Moreuil, Morgane Gosselin, Aurélien Delluc, Catherine Hanrotel-Saliou, Mathilde Le Jeune

CHU de Caen: Maxence Ficheux

CHU de Clermont-Ferrand: Julien Aniort

CHU d'Angers: Christian Lavigne, Jean Francois Augusto

CHU de Toulouse-Hôtel Dieu Saint Jacques: Dominique Chauveau, Joëlle Guitard, Antoine Huart, David Ribes

CHU de Tours-Hôpital Bretonneau: Philippe Gatault

Hôpital Civil de Colmar: Camille Becmeur, Sandrine Muller, Valérie Betz, Alexandre Klein, Gilles Blaison

Hôpital Bicêtre, Kremlin-Bicêtre: Raphaelae Seror, Hélène Francois, Xavier Mariette

Hôpital Bichat Claude Bernard, Paris: Aurore Aubrun, Baptiste Coustet, Elisabeth Palazzo, Sébastien Ottaviani, Tiphaine Goulenok, Eric Daugas, Philippe Dieudé, Thomas Papo

Hôpital Claude Huriez – CHRU Lille: Céline Lebas, Arnaud Lionet

Hôpital Cochin, Paris: Loïc Guillevin, Luc Mouthon, Xavier Puéchal

Hôpital de la Conception, Marseille: Noémie Jourde-Chiche

Hôpital Estaing, Clermont-Ferrand: Marc Ruivard

Hôpital Européen Georges-Pompidou, Paris: Alexandre Karras

Hôpital Henri Mondor, Créteil: Nicolas Limal, Thomas Kofman

Hôpital Saint Eloi, Montpellier: Alain Le Quellec

Hôpital Belle Isle, Metz: François Maurier

Hôpital Tenon, Paris: Aude Gibelin, Antoine Parrot, Claude Bachmeyer

Centre Hospitalier de La Rochelle: Bruno Gombert

Hôpital Lyon Sud: Mathilde Nouvier, Jean-Christophe Lega

Hôpital Saint Antoine, Paris: Olivier Fain

Hôpital Civil de Strasbourg: Emmanuel Andrès, Rachel Cottet

**Italy:** *alphabetical list by centre*

Azienda Ospedaliera Spedali Civili di Brescia: Gina Gregorini, Guido Jeannin, Stefano Possenti

Azienda Ospedaliera Universitaria di Parma: Carlo Buzio, Augusto Vaglio, Elena Oliva

**Japan:** *alphabetical list by centre*

Okayama University: Hirofumi Makino

Kitano Hospital: Eri Muso, Tomomi Endo, Hiroko Kakita, Hiroyuki Suzuki, Takaya Handa, Youngna Kang, Yuki Ariyasu

Kyoto University Hospital: Tatsuo Tsukamoto, Shuichiro Endo, Hitomi Miyata, Hiroyuki Yamada, Toshiko Ito-Ihara

Teikyo University Hospital: Shunya Uchida, Hajime Kono, Yoshihide Fujigaki, Hirotoishi Kikuchi, Toshihiro Nanki, Hideki Kato, Akiko Okamoto, Kurumi Asako, Kazuo Suzuki

Tokyo Metropolitan Geriatric Hospital: Yoshitomo Hamano

University of Tsukuba: Kunihiro Yamagata, Joichi Usui

University of Miyazaki: Shouichi Fujimoto, Yuji Sato, Masao Kikuchi

**Mexico:** *alphabetical list by centre*

Instituto Nacional de Enfermedades Respiratorias: Luis Felipe Flores-Suárez

Instituto Nacional de Cancerologia, Mexico City: Sergio A. Sánchez-Guerrero

**New Zealand:** *alphabetical list by centre*

Auckland City Hospital: Michael Collins

Dunedin Hospital: John Schollum

North Shore Hospital: Janak de Zoysa

Waikato Hospital: Vicki Quincy, Peter Sizeland

**Norway:** *alphabetical list by centre*

St. Olav's Hospital: Knut Aasarod

University Hospital North Norway: Marit Solbu, Trude Jannecke Bruun, Wenche Koldingsnes

**Poland:** *alphabetical list by centre*

Jagiellonian University: Anna Wludarczyk, Ilona Nowak, Jacek Gorka, Jan Sznajd, Agnieszka Padjas, Milosz Jankowski, Agnieszka Widawska, Wojciech Szczeklik

**Spain:** *alphabetical list by centre*

Fundacio Puigvert: Jose Ballarin

**Sweden:** *alphabetical list by centre*

Karolinska Institute: Annette Bruchfeld, Mats Efvergren

Linköping University Hospital: Per Eriksson

Skane University Hospital: Kerstin Westman, Daina Selga, Caroline Heijl, Sophie Ohlsson, Marten Segelmark

**United Kingdom:** *alphabetical list by centre*

Aberdeen Royal Infirmary: Neil Basu, Dana Kidder, Nicholas Fluck

Addenbrooke's Hospital: David RW Jayne, Rona Smith, Lisa Wilcocks, Mark McClure, Rachel Jones, Sapna Trivedi, Seerapani Gopaluni

Birmingham Clinical Trials Unit: Elizabeth Brettell, Paul Crump, Annika Feilbach, Catherine Hewitt, Nick Hilken, Andrew Howman, Terry Hughes, Natalie Ives, Hugh Jarrett, Samir Mehta, Rebecca Record, Gemma Ryan and Chaka Sidile

Cancer Research UK Clinical Trials Unit: Keith Wheatley

Freeman Hospital: Sheerin, Alison Brown, Laura Anne Baines, Jim Lordan

Hammersmith Hospital: Charles Pusey, Anisha Tanna, Stephen McAdoo, Jeremy Levy, Megan Griffith

Kent and Canterbury Hospital: Bernhard Klebe, Timothy Doulton

Leicester General Hospital: Graham Warwick, James Burton, Jonathon Barratt, Peter Topham, Richard Baines, Nigel Brunskill, Reem Al-Jayyousi

Manchester Royal Infirmary: Patrick Hamilton, Mumtaz Patel, Sandeep Mitra, Nina Brown

Oxford University Hospitals NHS Trust: Edward Sharples, Raashid Luqmani

Queen Elizabeth Hospital: Lorraine Harper, Benjamin Rhodes, Dimitrios Chanouzas, Matthew Morgan, Peter Hewins

Royal Berkshire Hospital: Oliver Floßmann, Nitin Bhandary, Julie Foxton, Linda Jones, Jenny King

Royal Devon & Exeter Hospital: Lucy Smyth, Richard D'Souza, Richard Haigh, Maxine Hough

Royal Free Hospital: Alan Salama, Aine Burns, Mark Little

Royal Infirmary of Edinburgh: Neeraj Dhaun

Royal Preston Hospital: Ajay Dhaygude

Royal Sussex County Hospital: Kolitha Basnayake, Neil Iggo

St. George's Hospital: Daniel Jones, David Oliveira, Iain AM MacPhee

St. James' University Hospital: Emma Dunn, Andrew JP Lewington

The Royal London Hospital: Stanley Linsun Fan, Ravindra Rajakariar, Magdi Yaqoob

University of Coventry and Warwickshire: Andrew Short

Western Infirmary: Colin Geddes, Bruce Mackinnon, Alan G Jardine

**United States of America:** *alphabetical list by centre*

Boston University School of Medicine: Paul Monach, Peter A. Merkel, Naomi Amudala, Karen Quillen

Cedars-Sinai Medical Center: Michael Weisman, Daniel Wallace, Lindsay Forbess, Swamy Venuturupalli

Cleveland Clinic: Carol Langford, Rula Hajj-Ali, Anna Koo, Gary Hoffman

Mayo Clinic: Ulrich Specks, Karina Keogh, Steven Ytterberg, Jeff Winters, Kenneth Warrington, Rodrigo Cartin-Ceba, Tobias Peikert, Fernando Fervenza, Misbah Baqir

University of North Carolina: Patrick Nachman, Randy Detwiler, Amy Mottl, Vimal Derebail, JulieAnne McGregor

University of Pennsylvania: Peter A. Merkel, Antoine Sreih, Rennie Rhee, Carol McAlear, Nicole Aquí

University of Pittsburgh Medical Center: Larry Moreland, Joseph Kiss, Kimberly Liang, Niveditha Mohan

University of Virginia: Rasheed Balogun

Washington University School of Medicine in St. Louis: Tingting Li, Richard Brasington

**Principal Investigators:** Michael Walsh (McMaster University), Peter A. Merkel (University of Pennsylvania), David R. W. Jayne (University of Cambridge)

**Trial Steering Committee:** Andrew Rees (Medical University of Vienna), David Scott (Norfolk and Norwich University Hospital), Paul Roderick (University of Southampton)

**Data Safety and Monitoring Committee:** Martin Landray (University of Oxford), Richard Watts (University of East Anglia), Jonathan Emberson (University of Oxford)



## **Section S2. Eligibility Criteria**

### ***Inclusion Criteria***

Participants must meet all of the following criteria:

1. New or previous relapsing clinical diagnosis of granulomatosis with polyangiitis (Wegener's), or microscopic polyangiitis consistent with the Chapel-Hill consensus definitions AND
2. Positive test, at any point in the subjects' disease course, by ELISA, for proteinase 3-ANCA or myeloperoxidase-ANCA AND
3. Severe vasculitis defined by at least one of the following manifestations:
  - a. Renal involvement characterized by both of the following:
    - i. Evidence of glomerulonephritis by either of the following:
      1. Renal biopsy demonstrating focal necrotizing glomerulonephritis or
      2. Active urine sediment characterized by glomerular haematuria/cellular casts and proteinuria
    - AND
    - ii. An estimated glomerular filtration (eGFR) rate of  $<50$  ml/min/1.73 m<sup>2</sup>. Patients known to have a stable eGFR  $<50$  ml/min/1.73 m<sup>2</sup> for greater than three months prior to enrollment are NOT eligible.
  - b. Pulmonary hemorrhage due to active vasculitis defined by the following:
    - i. A compatible chest x-ray or CT scan (diffuse pulmonary infiltrates) AND
    - ii. The absence of an alternative explanation for all pulmonary infiltrates (i.e. volume overload or pulmonary infection) AND
    - iii. At least one of the following:
      1. Evidence of alveolar hemorrhage on bronchoscopic examination or increasingly bloody returns with bronchoalveolar lavage
      2. Observed hemoptysis
      3. Unexplained anemia ( $<10$  g/dL) or documented drop in hemoglobin ( $>1$  g/dL) from less than 10g/dl
      4. An increased diffusing capacity of carbon dioxide
4. Provision of informed consent by patient or a surrogate decision maker. In some participating countries permission has also been granted to use deferred consent for enrolling a patient until a legal representative becomes available to consent on their behalf.

### ***Exclusion Criteria***

Participants must have none of the following:

1. A diagnosis of vasculitis other than granulomatosis with polyangiitis (Wegener's) or microscopic polyangiitis
2. A positive serum test for anti-glomerular basement membrane or a renal biopsy demonstrating linear glomerular immunoglobulin deposition
3. Receipt of dialysis for greater than 21 days immediately prior to randomization or prior renal transplant
4. Age  $<15$  years. In centres that do not routinely treat patients  $<18$  years or if no local investigator routinely treats patients  $<18$  years, enrollment may be restricted to patients 18 years or older
5. Pregnant at time of study entry

6. Treatment with >1 IV dose of cyclophosphamide and/or >14 days of oral cyclophosphamide and/or >14 days of prednisone/prednisolone (>30 mg/day) and/or treatment with >1 dose of rituximab within the last 28 days
7. A comorbidity or condition that, in the opinion of the investigator, precludes the use of cyclophosphamide/rituximab, glucocorticoids, or plasma exchange or absolutely mandates the use of plasma exchange
8. Plasma exchange in 3 months prior to randomization

### **Section S3. Cyclophosphamide Induction Regimen**

Standard induction therapy with cyclophosphamide (CYC) will be prescribed for at least 13 weeks and no more than 26 weeks. As the experience of using either oral or intra-venous (IV) routes of administration varies between centres and there is no apparent difference in efficacy or safety, the study protocol will allow the use of either oral or IV CYC. The CYC regimens will be identical for all treatment groups.

A starting dose of 15 mg/kg/pulse will be used for pulse CYC (maximum 1.2 g/dose) or 2 mg/kg/day for oral CYC (maximum 200 mg/day) with reductions made for age and renal function in each group according to previous trials conducted in Europe. Oral CYC will be administered daily with the recommendation for morning administration of full dose, if tolerated. Pulse CYC will be administered IV at a frequency of every two weeks for the first 3 doses then every three weeks thereafter. Modifications to dose and frequency will be made in the case of leucopenia.

For patients undergoing PLEX, PLEX will not occur for at least 24 hours following an IV dose of CYC.

For patients receiving PLEX and daily CYC (oral or IV), on days when PLEX is performed, CYC will be given following PLEX. PLEX will not be performed for at least 12 hours following a dose of oral CYC.

Full (complete) blood counts will be performed according to local protocol but the following minimum is recommended: patients receiving oral CYC should have their blood count monitored weekly for the first four weeks and weekly for four weeks after any dose adjustment and every other week thereafter. Patients receiving pulse CYC should have their blood count monitored 10 to 14 days after each dose and within 1 day prior to each dose.

Concomitant use of mesna is optional and left to the discretion of the investigator and local practice.

#### ***Dosage Modifications for Renal Function and Age***

Starting doses of CYC should be adjusted for advanced age or reduced renal function. Renal function may change over the course of the trial and medication dosages may be adjusted to reflect these changes.

#### ***Dosage Modification for Leucopenia***

Oral CYC should be held if the total WBC count is  $<4 \times 10^9/L$ . Oral CYC may be restarted at a dose at 25 mg/day less than previous once the WBC count is  $>4 \times 10^9$  on two consecutive tests or  $>5 \times 10^9$  on at least 1 test. After an episode of leucopenia, WBC counts should be monitored at least weekly for at least four weeks.

In the case of severe ( $WBC < 1 \times 10^9/L$ ) or prolonged ( $< 4 \times 10^9/L$  for  $>2$  weeks) leucopenia, oral CYC should be restarted at a dose at least 50 mg/day lower than the previous dose once the weekly WBC count permits. In cases of severe leucopenia, consideration should also be given to granulocyte-colony stimulating factor (G-CSF), fungal prophylaxis, and other precautions for patients with severe leucopenia.

Patients with a declining WBC count but no overt leucopenia (i.e. WBC count  $<6 \times 10^9$  and at least  $2 \times 10^9/L$  lower than previous) should have their WBC count rechecked within 1 week and have their oral CYC reduced by at least 25 mg/day if the WBC count continues to fall.

For pulse CYC the WBC count should be determined within 1 day prior to an IV pulse CYC. If the WBC count is  $<4 \times 10^9/L$ , the CYC dose should be postponed until the WBC count is  $>4 \times 10^9/L$  and the dose should be reduced to 75% of the planned dose (planned dose  $\times 0.75$ ).

The WBC count nadir should also be determined 10 to 14 days after the pulse dose is given. If the nadir is  $<3 \times 10^9/L$ , the next pulse should be reduced even if the next pre-dose WBC count is  $>4 \times 10^9/L$ . For a nadir

$<2 \times 10^9/L$ , the next dose should be 60% of the previous dose (previous dose  $\times$  0.6). For a nadir of  $2-3 \times 10^9/L$ , the next dose should be 80% of the previous dose (previous dose  $\times$  0.8).

Similar dose reductions to those made for leucopenia may be made for thrombocytopenia and anemia at the investigator's discretion. Dose alterations should also be made in the event of infectious complications.

#### **Section S4. Rituximab Induction Regimen**

Rituximab may be prescribed to patients as induction remission therapy. Rituximab will be prescribed as 4 intravenous doses of 375 mg/m<sup>2</sup> according to the following schedule:

1. Dose 1 within first 14 days of participation
2. Subsequent doses should occur 7 days after the previous dose. Doses may, however, occur 5 to 14 days to accommodate practical considerations of administering rituximab and to accommodate plasma exchange. All doses must be given within 42 days of the first dose. PLEX should not be given within the first 48 hours after administering rituximab.

Prophylaxis against infusion reactions must be given as 100 mg of intravenous hydrocortisone or equivalent with or without an anti-histamine agent immediately preceding the first rituximab infusion, and local guidelines should be followed before subsequent infusions of rituximab.

## **Section S5. Glucocorticoid Dosing Regimen**

### **1. Intravenous Glucocorticoids**

- a. *For Patients Who Have Not Received Any Glucocorticoid Therapy Prior To Randomization*  
Glucocorticoid therapy commenced with intravenous (IV) methylprednisolone irrespective of the glucocorticoid group the patient was allocated to. IV methylprednisolone was given as three daily pulse doses (minimum 1g maximum 3g, total dose). Each pulse dose could be between 0.5 g and 1 g at the local investigators discretion. The day following the last IV methylprednisolone dose, patients commenced the randomized oral glucocorticoid regimen.
- b. *For Patients Who Have Received <3 g IV Methylprednisolone Within 14 days Prior To Randomization*  
IV methylprednisolone that was administered within 14 days prior to randomization contributed to the maximum allowable dose of 3g. If <3 g of IV methylprednisolone were given within 14 days prior to randomization, participants could receive additional IV methylprednisolone over 3 days after randomization to reach a minimum of 1 g and a maximum of 3 g (including all IV methylprednisolone given within 14 days prior to randomization). The day following the last IV methylprednisolone dose, patients commenced the randomized oral glucocorticoid regimen.
- c. *For Participants Who Have Received Oral GC But No IV Methylprednisolone Within 14 Days Prior to Randomization*  
Oral glucocorticoid given prior to randomization did not impact on the protocol glucocorticoid regimen in terms of either IV methylprednisolone or oral GC. These patients were treated as if they had not received any glucocorticoid prior to randomization.
- d. *Patients Who Have Received  $\geq 3$  g Of IV Methylprednisolone Within 14 Days Prior to Randomization*  
Patients that received  $\geq 3$  g IV methylprednisolone within 14 days prior to randomization began the oral glucocorticoid regimen according to their randomized group within 24 hours of randomization.

### **2. Randomized Oral Glucocorticoid Therapy**

Oral glucocorticoid therapy consisted of non-enteric coated prednisone or prednisolone at equivalent mg to mg doses. Dosing was weight based with three possible weight categories. All oral glucocorticoids were given as a single daily dose. Patients intolerant of oral medications or for whom oral medications were contraindicated could be given an equivalent daily IV dose. Pre-printed prescriptions or pre-packaged medication were provided for each patient in the trial after randomization to enhance adherence to the allocated glucocorticoid regimen. The standard-dose regimen and reduced-dose regimen are summarized below in Table S3.

Oral glucocorticoid therapy continued from the end of week 23 at a dose of 5 mg/day until at least week 52 of the study after which glucocorticoid therapy reverted to the local investigator's choice of dosing. Alternate day dosing regimens (i.e. those that use two different doses on alternate days) could be used to achieve the appropriate average daily dose required by the protocol but differences in alternative day doses could not be >5 mg. For example, a dose of 12.5 mg/day may be achieved by alternating daily doses of 15 mg/day and 10 mg/day.

## **Section S6. Plasma Exchange Regimen**

Plasma exchange therapy was only prescribed in addition to standard induction therapy. Plasma exchange consisted of 7 exchanges within 14 days of randomization, at a dose of at least 60 ml/kg (based on actual body weight) per session using albumin (3% to 5% depending on local availability, with or without crystalloid) as a replacement solution. Intravenous immunoglobulin was not used after plasma exchange.

The following parameters were determined according to local practice: 1) plasma exchange was allowed to be performed by centrifugation or filter separation technique but double filtration apheresis was not permitted 2) Anticoagulation could be provided by citrate or by heparin but it was suggested that in patients with active bleeding, regional citrate anticoagulation be utilized, 3) plasma exchange could be performed via a central venous catheter if the participant was deemed unsuitable for peripheral venous access but the latter was strongly recommended, and 4) monitoring of coagulation parameters or immunoglobulin levels, and 5) plasma exchange dose could be reduced for plasma exchange related complications according to local best medical practice and indications.

### ***Patients with Bleeding Risks***

Renal biopsy the day of PLEX was to be avoided, to minimize the risk of bleeding from dilutional coagulopathy.

Local practice was to be followed for patients with active bleeding including patients with known pulmonary hemorrhage or a bleeding episode from any source within the 24 hours prior to plasma exchange treatment. This could have included fresh frozen plasma at the end of the exchange.

### ***Additional Plasma Exchange Treatments***

Patients were not permitted additional plasma exchange treatments for ongoing signs or symptoms of AAV, serological markers of disease (e.g. elevated ANCA titres), elevated markers of inflammation, or histologic evidence of disease activity. Any plasma exchange treatments considered outside of the treatment protocol were to be discussed with the trial medical monitor.

## **Section S7. Outcome Definitions**

End-stage kidney disease: the requirement of a renal replacement therapy (hemodialysis or peritoneal dialysis) for at least 12 consecutive weeks or the receipt of a renal transplantation.

Major relapse: new or worsened disease activity that occurs after remission has been initially induced and affects a major item of the BVAS/WG.

Minor relapse: new or worsening disease activity that occurs after remission has been initially induced that does NOT affect a major item of the BVAS/WG.

Serious adverse event: any medical occurrence that results in permanent disability, hospitalization or the prolongation of a hospitalization, is life threatening or results in death.

Serious Infection: an infectious syndrome that requires intravenous antibiotics or hospitalization for treatment or caused death.

Sustained remission: remission that occurs within 6 months of randomization and lasts until at least 12 months after randomization without a relapse of disease.



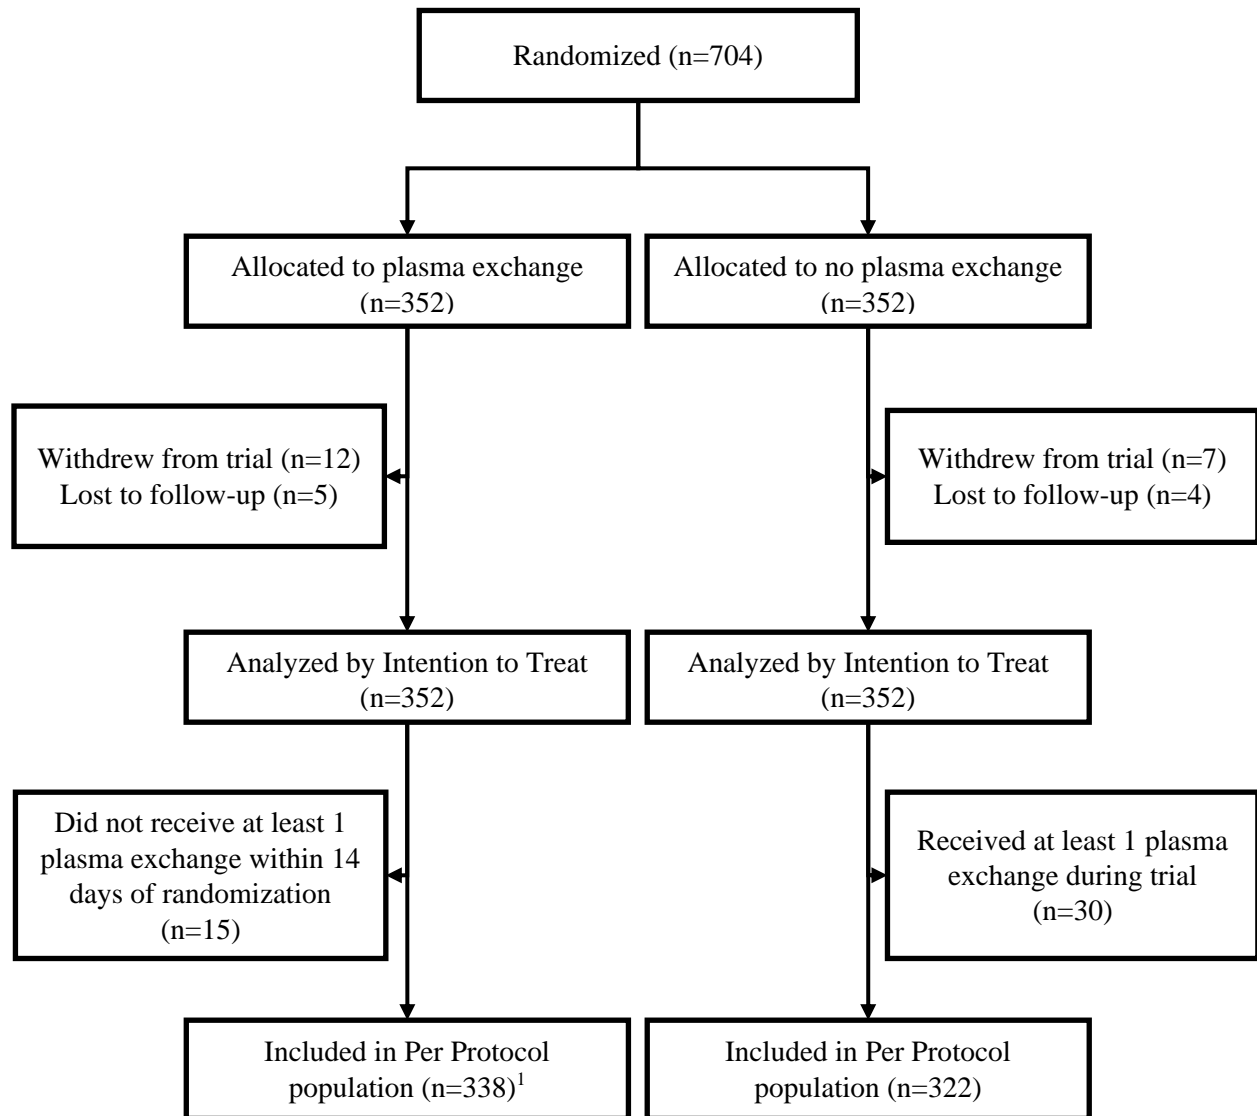

**Figure S1. Plasma exchange participants**

<sup>1</sup>The per-protocol population included 336 participants known to have received at least one plasma exchange within 14 days of randomization and two participants who died before they could receive plasma exchange.

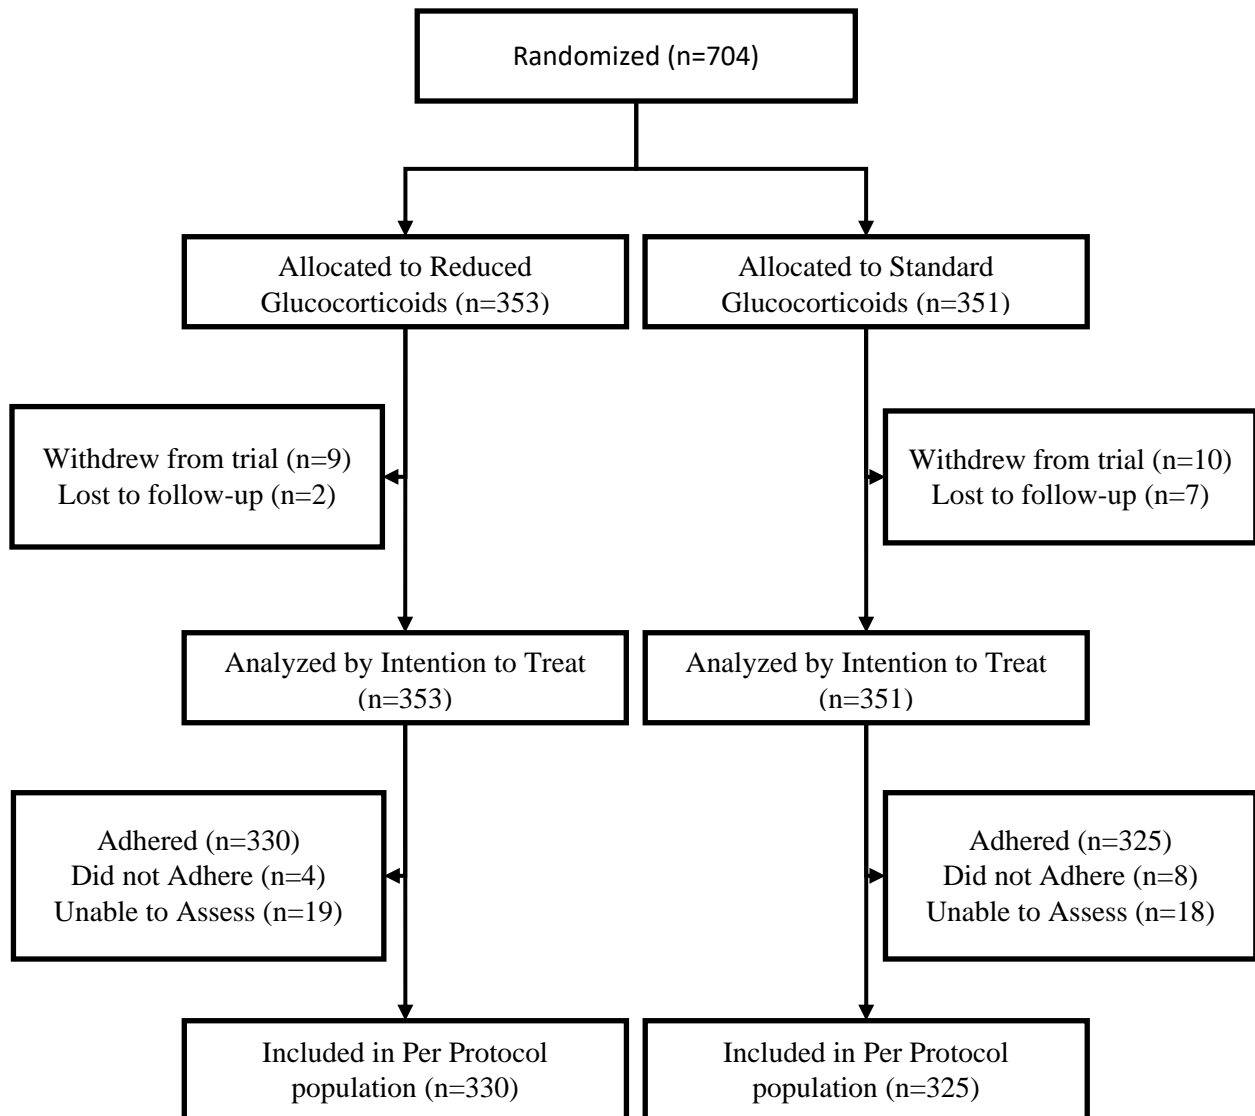

**Figure S2. Glucocorticoid dosing participants**

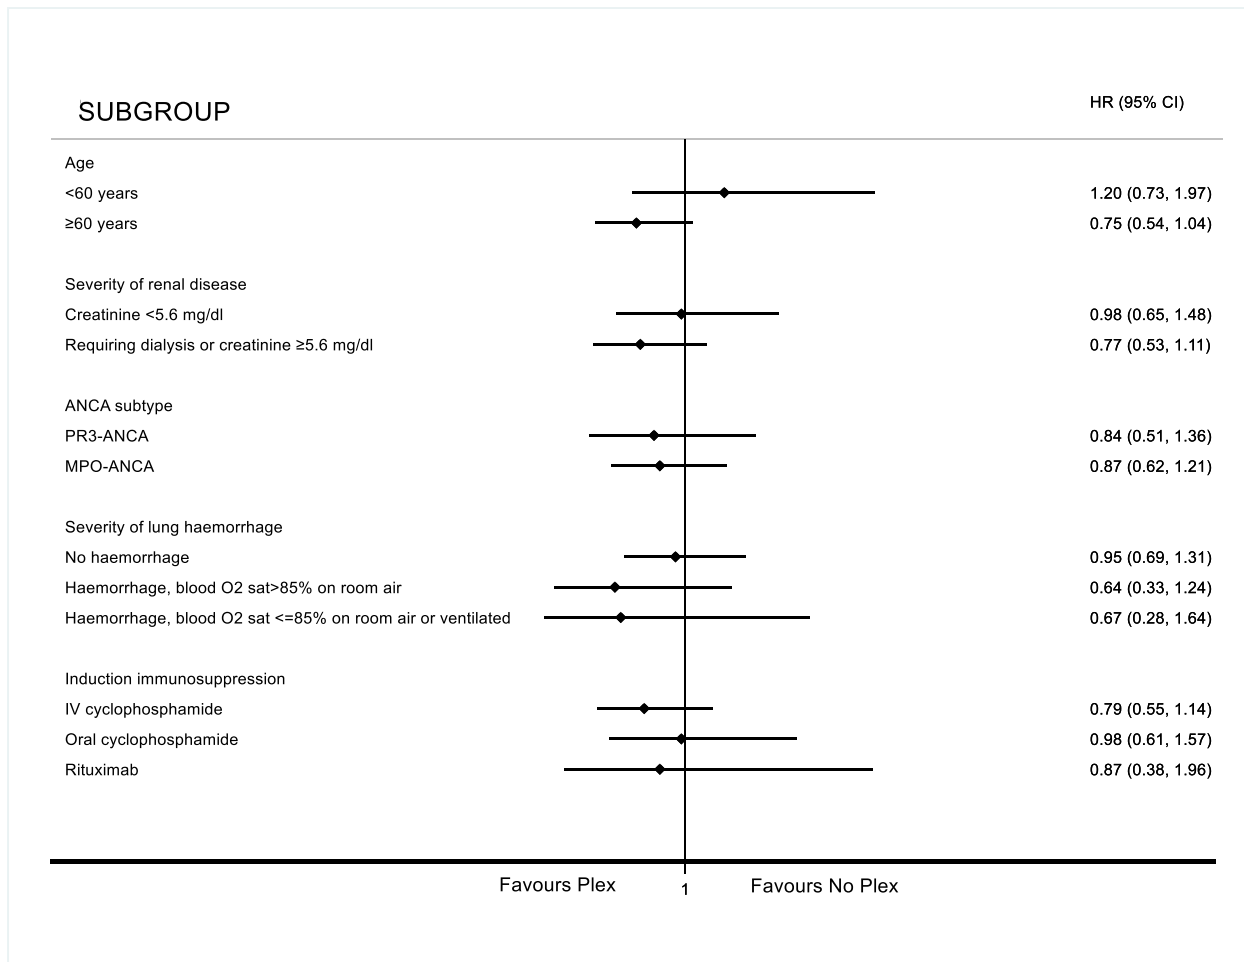

**Figure S3. Results of subgroup analyses of the effect of plasma exchange on the primary outcome of death from any cause or end-stage kidney disease.**

CI = confidence interval; ANCA = anti-neutrophil cytoplasmic antibody; PR3 = anti-proteinase antibody; MPO = anti-myeloperoxidase antibody; IV = intravenous; 500 µmol/L = 5.6 mg/dL; Plex = Plasma Exchange

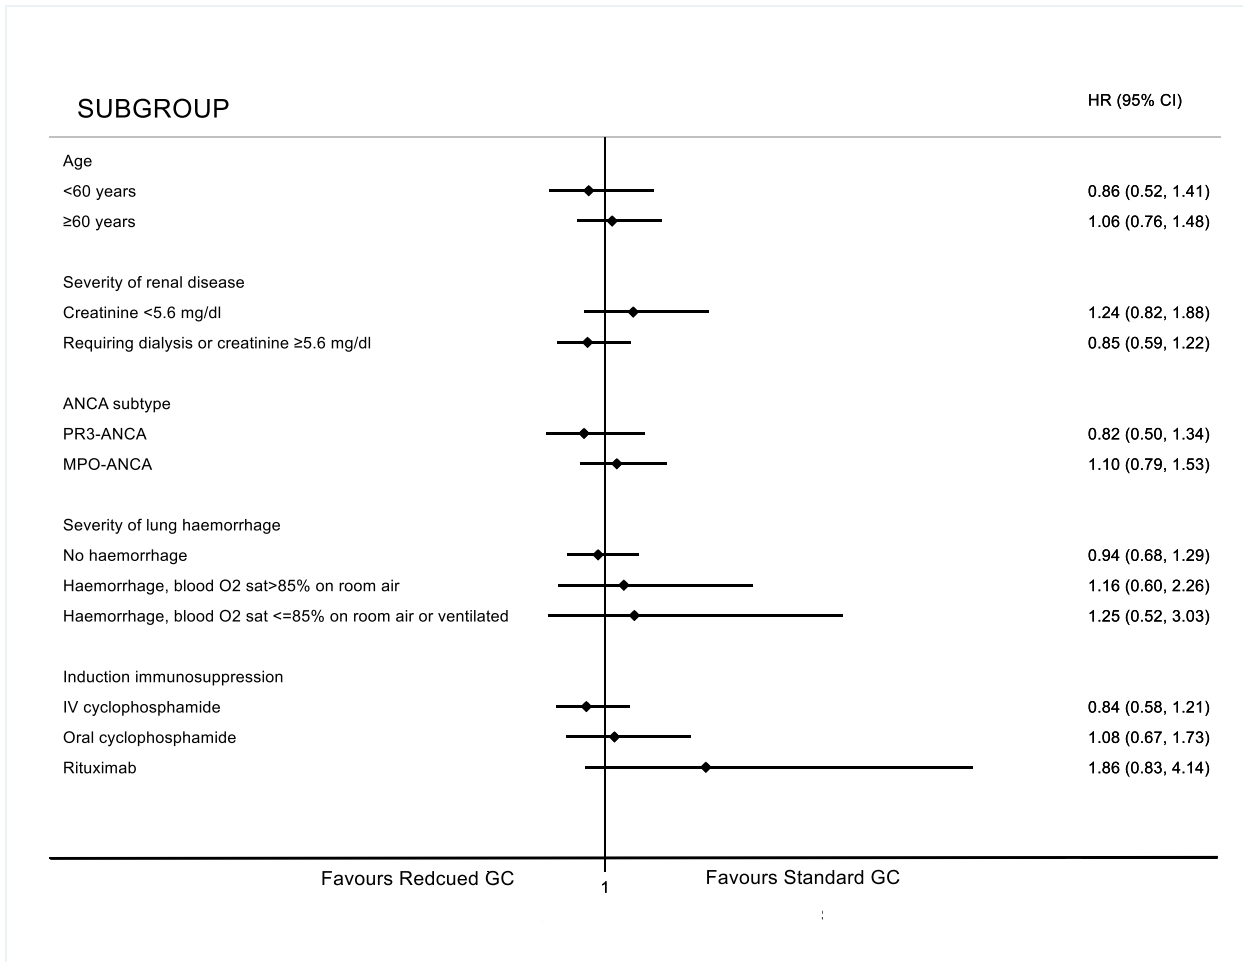

**Figure S4. Results of subgroup analyses of the effect of a reduced-dose regimen of oral glucocorticoids on the primary outcome of death from any cause or end-stage kidney disease.**

CI = confidence interval; ANCA = anti-neutrophil cytoplasmic antibody; PR3 = anti-proteinase antibody; MPO = anti-myeloperoxidase antibody; O2 sat = oxygen saturation; IV = intravenous; 500 µmol/L = 5.6 mg/dL; GC = glucocorticoids

**Table S1. Pulse intravenous cyclophosphamide schedule. Doses may be modified for age and renal function. After week 13, patients in remission may be transitioned to remission-maintenance therapy.**

| <b>Time (weeks)</b> | <b>Pulse number</b> | <b>Dose</b> |
|---------------------|---------------------|-------------|
| 0                   | 1                   | 15 mg/kg    |
| 2                   | 2                   | 15 mg/kg    |
| 4                   | 3                   | 15 mg/kg    |
| 7                   | 4                   | 15 mg/kg    |
| 10                  | 5                   | 15 mg/kg    |
| 13                  | 6                   | 15 mg/kg    |
| 16                  | 7                   | 15 mg/kg    |
| 19                  | 8                   | 15 mg/kg    |
| 22                  | 9                   | 15 mg/kg    |
| 25                  | 10                  | 15 mg/kg    |

**Table S2. Oral and intravenous cyclophosphamide dose adjustments (mg/kg) for age and renal impairment.**

| Age   | Oral Cyclophosphamide<br>eGFR (ml/min/1.73 m <sup>2</sup> ) |      | IV Cyclophosphamide<br>eGFR (ml/min/1.73 m <sup>2</sup> ) |      |
|-------|-------------------------------------------------------------|------|-----------------------------------------------------------|------|
|       | >30                                                         | ≤30  | >30                                                       | ≤30  |
| <60   | 2                                                           | 1.5  | 15                                                        | 12.5 |
| 60-70 | 1.5                                                         | 1.25 | 12.5                                                      | 10   |
| >70   | 1.25                                                        | 1    | 10                                                        | 7.5  |

NOTE: dose reductions for renal impairment should reflect renal function at the time the dose is given rather than baseline renal function

**Table S3. Dosing for oral Glucocorticoids in the standard and reduced-dose limbs from trial start.**

| Week  | Standard                      |          |        | Reduced-dose                  |          |        |
|-------|-------------------------------|----------|--------|-------------------------------|----------|--------|
|       | <50 kg                        | 50-75 kg | >75 kg | <50 kg                        | 50-75 kg | >75 kg |
|       | pulse                         | pulse    | pulse  | pulse                         | pulse    | pulse  |
| 1     | 50                            | 60       | 75     | 50                            | 60       | 75     |
| 2     | 50                            | 60       | 75     | 25                            | 30       | 40     |
| 3-4   | 40                            | 50       | 60     | 20                            | 25       | 30     |
| 5-6   | 30                            | 40       | 50     | 15                            | 20       | 25     |
| 7-8   | 25                            | 30       | 40     | 12.5                          | 15       | 20     |
| 9-10  | 20                            | 25       | 30     | 10                            | 12.5     | 15     |
| 11-12 | 15                            | 20       | 25     | 7.5                           | 10       | 12.5   |
| 13-14 | 12.5                          | 15       | 20     | 6                             | 7.5      | 10     |
| 15-16 | 10                            | 10       | 15     | 5                             | 5        | 7.5    |
| 17-18 | 10                            | 10       | 15     | 5                             | 5        | 7.5    |
| 19-20 | 7.5                           | 7.5      | 10     | 5                             | 5        | 5      |
| 21-22 | 7.5                           | 7.5      | 7.5    | 5                             | 5        | 5      |
| 23-52 | 5                             | 5        | 5      | 5                             | 5        | 5      |
| >52   | Investigators' Local Practice |          |        | Investigators' Local Practice |          |        |

**Table S4. Health related quality of life 12 months after randomization.** For all scores, higher scores indicate better health related quality of life. Commonly accepted minimally important differences for the SF-36 are at least 5 points, for the EQ-5D Index is at least 0.03 points, and for the EQ-5D Thermometer is at least 5 points.

| <b>Score</b>             | <b>PLEX</b> | <b>No PLEX</b> | <b>Mean Difference (95% CI)</b> | <b>Reduced-Dose Glucocorticoids</b> | <b>Standard-Dose Glucocorticoids</b> | <b>Mean Difference (95% CI)</b> |
|--------------------------|-------------|----------------|---------------------------------|-------------------------------------|--------------------------------------|---------------------------------|
| <b>SF-36 PCS</b>         | 39.04       | 37.96          | 1.07 (-0.46 to 2.61)            | 39.13                               | 37.84                                | 1.29 (-0.26 to 2.84)            |
| <b>SF-36 MCS</b>         | 51.94       | 51.40          | 0.55 (-0.67 to 1.76)            | 52.16                               | 51.19                                | 0.97 (-0.24 to 2.18)            |
| <b>EQ-5D Index</b>       | 0.79        | 0.77           | 0.02 (-0.01 to 0.05)            | 0.79                                | 0.77                                 | 0.02 (-0.01 to 0.05)            |
| <b>EQ-5D Thermometer</b> | 72.13       | 71.10          | 1.04 (-1.09 to 3.16)            | 72.11                               | 71.07                                | 1.04 (-1.09 to 3.17)            |

PLEX = plasma exchange; SF-36 = short form 36; PCS = physical component score; MCS = mental component score; EQ = EuroQol



**Table S5. Number of patients experiencing serious adverse events.**

| <b>Serious Adverse Event Type</b> | <b>PLEX (N=352)</b> | <b>No PLEX (n=352)</b> | <b>Relative Risk (95% CI)</b> | <b>Reduced-Dose Glucocorticoids (N=353)</b> | <b>Standard-Dose Glucocorticoids (n=351)</b> | <b>Unadjusted Relative Risk (95% CI)</b> |
|-----------------------------------|---------------------|------------------------|-------------------------------|---------------------------------------------|----------------------------------------------|------------------------------------------|
| <b>Cardiovascular</b>             | 69 (20%)            | 55 (16%)               | 1.25 (0.91 to 1.73)           | 68 (19%)                                    | 56 (16%)                                     | 1.21 (0.88 to 1.66)                      |
| <b>Endocrine</b>                  | 9 (3%)              | 3 (1%)                 | 3.00 (0.82 to 11.0)           | 4 (1%)                                      | 8 (2%)                                       | 0.50 (0.15 to 1.64)                      |
| <b>Gastrointestinal</b>           | 34 (10%)            | 39 (11%)               | 0.87 (0.56 to 1.35)           | 43 (12%)                                    | 30 (9%)                                      | 1.43 (0.92 to 2.22)                      |
| <b>Hematologic</b>                | 25 (7%)             | 16 (5%)                | 1.56 (0.85 to 2.88)           | 22 (6%)                                     | 19 (5%)                                      | 1.15 (0.63 to 2.09)                      |
| <b>Infection</b>                  | 136 (39%)           | 114 (32%)              | 1.19 (0.98 to 1.46)           | 119 (34%)                                   | 131 (37%)                                    | 0.90 (0.74 to 1.10)                      |
| <b>Kidney/Urinary</b>             | 41 (12%)            | 36 (10%)               | 1.14 (0.75 to 1.74)           | 50 (14%)                                    | 27 (8%)                                      | 1.84 (1.18 to 2.87)                      |
| <b>Surgery</b>                    | 16 (5%)             | 13 (4%)                | 1.23 (0.60 to 2.52)           | 14 (4%)                                     | 15 (4%)                                      | 0.93 (0.45 to 1.89)                      |
| <b>Vasculitis relapse</b>         | 23 (7%)             | 32 (9%)                | 0.72 (0.43 to 1.20)           | 32 (9%)                                     | 23 (7%)                                      | 1.38 (0.83 to 2.32)                      |
| <b>Other</b>                      | 89 (25%)            | 79 (22%)               | 1.13 (0.86 to 1.47)           | 91 (26%)                                    | 77 (22%)                                     | 1.18 (0.90 to 1.53)                      |

PLEX = plasma exchange; CI = confidence interval
